# Supplementary material
Source: ML conference proceedings conference paper supplement (https://openreview.net/forum?id=rKbECDUsclc)
Supplement: supplementary_material [file attachment]

---

# On the Definition and Computation of Causal Treewidth

---

Yizuo Chen<sup>1</sup>

Adnan Darwiche<sup>1</sup>

<sup>1</sup>Computer Science Department, University of California, Los Angeles, USA

## Abstract

Causal treewidth is a recently introduced notion allowing one to speed up Bayesian network inference and to bound its complexity in the presence of functional dependencies (causal mechanisms) whose identities are unknown. Causal treewidth is no greater than treewidth and can be bounded even when treewidth is unbounded. The utility of causal treewidth has been illustrated recently in the context of causal inference and model-based supervised learning. However, the current definition of causal treewidth is descriptive rather than perspective, therefore limiting its full exploitation in a practical setting. We provide an extensive study of causal treewidth in this paper which moves us closer to realizing the full computational potential of this notion both theoretically and practically.

## INTRODUCTION

Treewidth is one of the most influential notions for parameterizing the complexity of probabilistic inference. This notion originated in the graph theory literature and can be viewed as a measure of graph connectivity [Robertson and Seymour, 1986]. It has also been used to parameterize the complexity of many algorithmic tasks that transcend probabilistic inference; see, e.g., [Bodlaender, 2006, Dechter, 2003]. For Bayesian networks, the time and space complexity of computing marginals is bounded by  $O(n \cdot \exp(w))$  where  $n$  is the number of nodes in the network and  $w$  is its treewidth. For example, tree-structured networks have a treewidth  $\leq 1$  so treewidth allows us to show that inference on such networks can be done in linear time and space.

Treewidth captures the structural aspects of a model and is independent of its parameters. Hence, one can use treewidth to provide guarantees on the complexity of inference without needing to know the model parameters. In the first few

decades of research on Bayesian network inference, the perception was that high treewidth is a barrier since all influential algorithms at that time, particularly the jointree and variable elimination algorithms [Jensen et al., 1990, Zhang and Poole, 1996, Dechter, 1996], had a complexity which was also lower bounded exponentially by treewidth. Later developments showed that exploiting the parametric structure of Bayesian networks can lead to tractable inference in some situations where the treewidth can be very high; see, e.g., [Larkin and Dechter, 2003, Chavira and Darwiche, 2005, Chavira et al., 2006, Chavira and Darwiche, 2008]. The parametric structure exploited was particularly in the form of context-specific independence [Boutilier et al., 1996] and logical constraints (i.e., parameters in  $\{0, 1\}$ ).<sup>1</sup>

More recently, a new and more abstract type of parametric structure has been identified and exploited computationally: functional dependencies, also known as causal mechanisms, which identities are *unknown* [Darwiche, 2020]. In a Bayesian network, a node is functionally determined by its parents if fixing the state of these parents also fixes the state of the node (that is, the node distribution is deterministic given any state of its parents). We often know that a node is functionally determined by its parents but without knowing the identity of the underlying function. This is prominent, for example, in causal inference where one typically has a causal graph in which every internal node is assumed to be functionally determined by its parents yet without knowing the specific functions that relate nodes to their parents [Pearl, 2000]. Classical techniques for exploiting parametric structure are not applicable in this case since

---

<sup>1</sup>Among the most effective approaches for exploiting parametric structure are the ones based on compiling Bayesian networks into tractable circuits [Darwiche, 2003]. These approaches allow one to conduct inference in time linear in the circuit size while yielding circuits whose size is not necessarily exponential in treewidth—see [Darwiche, 2021a] for a recent survey on circuit representations and [Agrawal et al., 2021] for a recent empirical evaluation in which methods based on circuits ranked at the forefront in terms of efficiency.

these methods require knowledge of the specific model parameters which imply knowledge of the specific functions that determine the values of internal nodes. This also arises when learning the parameters of a Bayesian network from data where we may have background knowledge to the effect that some nodes are functionally determined by their parents but without knowing the specific functions as we are trying to learn them; see, e.g., [Chen et al., 2020]. Interestingly enough, a recent finding showed that one can exploit unknown causal mechanisms computationally, leading to potentially exponential reduction in complexity [Darwiche, 2020]. This finding was based on two new theorems and cast in the context of model-based supervised learning. It particularly took the form of an algorithm that compiles the *structure* of a Bayesian network into a tractable circuit whose size is not necessarily exponential in treewidth. This approach managed to efficiently compile circuits for networks with treewidth over 100 without needing to know the network parameters, only that some nodes are functionally determined by their parents. More recently, this finding was cast in the context of causal inference while hinting that it can lead to a new parameter for bounding complexity that was called *causal treewidth* [Darwiche, 2021b].

Treewidth is classically defined for an undirected graph but it can be extended to directed acyclic graphs (DAGs) by computing the treewidth of the *moralized* DAG. This is an undirected graph obtained from the DAG by connecting every pair of parents by an edge and then removing the directionality of edges; see, e.g., [Darwiche, 2009, Ch 9]. Causal treewidth applies only to DAGs in which some nodes are declared as being *functional*. If no nodes are functional, then the causal treewidth reduces to treewidth. While [Darwiche, 2021b] suggested this more refined notion of causal treewidth, it did not provide an operational definition of causal treewidth and therefore it did not specify a method for computing it. Moreover, while [Darwiche, 2020] showed that inference can be sped up, exponentially in some cases, by exploiting unknown causal mechanisms, it did not fully exploit the two new theorems that enabled these techniques.

Our goal in this paper is to first review the two key theorems in [Darwiche, 2020] that enabled the computational exploitation of unknown causal mechanisms, and to then use them as basis for formally defining the notion of causal treewidth and how it can be computed. In the process of doing so, we will prove some results about the algorithmic techniques proposed in [Darwiche, 2020], showing that some are optimal while others are not. In other words, we will show that the algorithmic techniques proposed in [Darwiche, 2020] do not fully exploit the two enabling theorems identified in that work. Hence, the main contribution of this work is that it brings us closer, both theoretically and practically, towards the full exploitation of unknown causal mechanisms during inference. At a more cognitive level, our contribution may provide further hints as to why causal knowledge is so

| $A$ | $B$ | $C$ | $f_C(ABC)$ |
|-----|-----|-----|------------|
| t   | t   | t   | 0.7        |
| t   | t   | f   | 0.3        |
| t   | f   | t   | 0.1        |
| t   | f   | f   | 0.9        |
| f   | t   | t   | 0.4        |
| f   | t   | f   | 0.6        |
| f   | f   | t   | 0.5        |
| f   | f   | f   | 0.5        |

(a) CPT for  $C$

| $A$ | $B$ | $C$ | $f_C(ABC)$ |
|-----|-----|-----|------------|
| t   | t   | t   | 0          |
| t   | t   | f   | 1          |
| t   | f   | t   | 1          |
| t   | f   | f   | 0          |
| f   | t   | t   | 1          |
| f   | t   | f   | 0          |
| f   | f   | t   | 0          |
| f   | f   | f   | 1          |

(b) Mechanism for  $C$

Figure 1: Two CPTs for variable  $C$  with parents  $A, B$ . The second CPT represents a mechanism for variable  $C$ .

central to human reasoning [Pearl and Mackenzie, 2018] as we provide a formal account of how causal knowledge, even in this abstract form, can be quite useful computationally.

We start next with some further motivation, technical preliminaries and a review of the key results in [Darwiche, 2020]. We then study two key ingredients which are needed to formally define causal treewidth: jointree thinning and mechanism replication. We finally define causal treewidth and present some experimental results that shed more light on this notion and its underlying ingredients. Proofs of all results can be found in the appendix.

## MOTIVATION AND PRELIMINARIES

Variables are discrete and denoted by uppercase letters (e.g.,  $X$ ) and their values are denoted by lowercase letters (e.g.,  $x$ ). Sets of variables are denoted by boldface, uppercase letters (e.g.,  $\mathbf{X}$ ) and their instantiations are denoted by boldface, lowercase letters (e.g.,  $\mathbf{x}$ ). A *factor*  $f(\mathbf{X})$  is a mapping from instantiations  $\mathbf{x}$  to non-negative numbers. A Bayesian network is a DAG  $G$  together with one conditional probability table (CPT) for each node  $X$  and its parents  $\mathbf{P}$  in the DAG. A CPT specifies a conditional distribution  $\Pr(X|\mathbf{P})$  and will be represented by a factor  $f(X\mathbf{P})$  where  $f(x\mathbf{p}) = \Pr(x|\mathbf{p})$  (hence,  $\sum_x f(x\mathbf{p}) = 1$ ). To indicate that factor  $f(X\mathbf{P})$  is a CPT for variable  $X$ , we will usually notate it as  $f(X, \mathbf{P})$  or  $f_X(X\mathbf{P})$ . Of particular interest are CPTs (factors) that specify functions, also referred to as mechanisms.

**Definition 1.** A factor  $f(X, \mathbf{P})$  is a *mechanism* for  $X$  (or  $X$ -mechanism) iff  $f(x, \mathbf{p}) \in \{0, 1\}$  and  $\sum_x f(x, \mathbf{p}) = 1$ .

A mechanism for variable  $X$  represents a function whose inputs are parents  $\mathbf{P}$  and whose output is  $X$ . Figure 1 depicts two factors over binary variables  $\{A, B, C\}$ . The factor in Figure 1a is a CPT for variable  $C$  but is not a mechanism. The one in Figure 1b is also a CPT for  $C$  but is a mechanism which corresponds to the function  $C = A \oplus B$ .

The use of mechanisms is ubiquitous in causality [Pearl, 2000]. In this context, root nodes in the DAG are called *exogenous* and internal nodes are called *endogenous*. A common class of models known as functional Bayesian net-

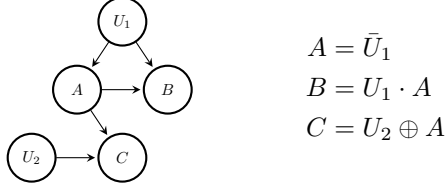

Figure 2: SCM with endogenous variables  $A, B, C$  and exogenous variables  $U_1, U_2$ . All variables are binary. The mechanisms for endogenous variables are specified by structural equations.

works or Structural Causal Models (SCMs) assume that the CPTs of all endogenous variables are mechanisms. Figure 2 depicts an example SCM where the mechanisms for endogenous variables ( $A, B, C$ ) are specified using structural equations as is commonly done. For this model to be complete, one also needs the CPTs for exogenous variables ( $U_1, U_2$ ) which specify the distributions  $Pr(U_1)$  and  $Pr(U_2)$ , the only source of uncertainty in the model.

A classical setup in causal inference is to only have the graph of an SCM while assuming that the mechanisms (structural equations) are not known. In Figure 2, this would amount to assuming that each endogenous variable ( $A, B, C$ ) is a function of its parents, yet without knowing what these functions are. For example, we may not know whether the function for variable  $C$  is  $C = U_2 \oplus A$  or  $C = U_2 + \bar{A}$  or  $C = U_2 \cdot A$  or something else (there are 16 possible mechanisms for a binary variable with two binary parents). This situation may also arise in non-causality contexts where the assumption of unknown mechanisms can be viewed as background knowledge; see, e.g., [Chen et al., 2020].

In these situations, one typically has data in addition to the graph of a Bayesian network and the goal is to perform inference based on this available information; for example, by first estimating model parameters as suggested in [Zafalon et al., 2021, Darwiche, 2021b, Chen et al., 2020]. This requires inference algorithms whose complexity is independent of the model parameters. Until relatively recently, the best complexity one could attain in this case is exponential in the graph treewidth. This complexity has been improved exponentially though due to the results in [Darwiche, 2020] and one goal of our work is to improve and further formalize these recent advances using the notion of causal treewidth.<sup>2</sup>

## COMPUTING MARGINALS

There are two operations on factors, multiplication and sum-out, which allow us to define the computational problem

<sup>2</sup>A reviewer suggested using the term *functional treewidth* instead of *causal treewidth*. Our choice for the latter term is motivated by the emphasis we wish to place on exploiting “unknown” functions which are prevalent in causal inference, in contrast to the more common and informed exploitation of “known” functions.

whose complexity we wish to bound using causal treewidth. The *product* of factors  $f(\mathbf{X})$  and  $g(\mathbf{Y})$  is another factor  $h(\mathbf{Z})$ , where  $\mathbf{Z} = \mathbf{X} \cup \mathbf{Y}$  and  $h(\mathbf{z}) = f(\mathbf{x})g(\mathbf{y})$  for the unique instantiation  $\mathbf{z}$ . *Summing-out* variables  $\mathbf{Y} \subseteq \mathbf{X}$  from factor  $f(\mathbf{X})$  yields another factor  $g(\mathbf{Z})$ , where  $\mathbf{Z} = \mathbf{X} \setminus \mathbf{Y}$  and  $g(\mathbf{z}) = \sum_{\mathbf{y}} f(\mathbf{yz})$ . We will use  $\sum_{\mathbf{Y}} f$  to denote the resulting factor  $g$ . We will also use  $\sum_{\bar{\mathbf{Z}}} f$  to denote summing out all variables from factor  $f$  except for variables  $\mathbf{Z}$ . That is, for a factor  $f(\mathbf{X})$ , we will write  $\sum_{\bar{\mathbf{Z}}} f$  to mean  $\sum_{\mathbf{Y}} f$  where  $\mathbf{Y} = \mathbf{X} \setminus \mathbf{Z}$ .

The *joint distribution* of a Bayesian network is the product of its CPTs. The network on the right has CPTs  $f_A(A)$ ,  $f_B(AB)$ ,  $f_C(AC)$ ,  $f_D(BCD)$  and  $f_E(CE)$ . Its joint distribution is  $Pr(ABCDE) = f_A f_B f_C f_D f_E$ . We can now compute the marginal over any variables by summing out all other variables from the joint distribution. For example, the marginal over variable  $D$  is the factor  $Pr(D) = \sum_{ABCE} f_A f_B f_C f_D f_E = \sum_{\bar{D}} f_A f_B f_C f_D f_E$ . It is this computation of marginals that we will be bounding using causal treewidth. We are particularly interested in computing marginals over *families*, where a family is a variable and its parents, since these marginals form the basis of parameter estimation using algorithms such as gradient descent and EM; see, e.g., [Darwiche, 2009, Ch 17].

**Definition 2.** Consider a DAG  $G$  with nodes  $X_1, \dots, X_n$  and let  $\mathbf{P}_i$  be the parents of  $X_i$ . Given a set of factors  $f(X_i \mathbf{P}_i)$  for  $i = 1, \dots, n$ , the *marginals problem* is to compute the factor  $\sum_{\bar{\mathbf{F}}} \prod_{i=1}^n f(X_i \mathbf{P}_i)$  for each family  $\mathbf{F}$ .

A factor  $f(X_i \mathbf{P}_i)$  will be called a *family factor*. The marginals problem does not place any restrictions on family factors so it is quite general. When these factors are CPTs, the marginals problem corresponds to the computation of marginals in a Bayesian network.

As mentioned earlier, if the Bayesian network has  $n$  nodes and treewidth  $w$ , marginals can be computed in  $O(n \cdot \exp(w))$  time and space. The simplest proof of this result is based on the algorithm of variable elimination (VE) which applies more generally to the problem in Definition 2 [Zhang and Poole, 1996, Dechter, 1996]. VE is based on two theorems, the first allows us to sum out variables in any order.

**Theorem 1.**  $\sum_{\mathbf{XY}} f = \sum_{\mathbf{X}} \sum_{\mathbf{Y}} f = \sum_{\mathbf{Y}} \sum_{\mathbf{X}} f$ .

The second theorem allows us to pull out factors from sums.

**Theorem 2.** If variables  $\mathbf{X}$  appear in factor  $f$  but not in factor  $g$ , then  $\sum_{\mathbf{X}} f \cdot g = g \sum_{\mathbf{X}} f$ .

Consider the factor  $\sum_{ABDE} f(ACE)g(BCD)$ . A direct computation of this factor multiplies factors  $f$  and  $g$  to yield the factor  $h(ABCDE)$  and then sums out variables  $ABDE$

from  $g$ . Using Theorem 1, we can arrange the above sum into  $\sum_{AE} \sum_{BD} f(ACE)g(BCD)$ . Using Theorem 2, we can arrange it further into  $\sum_{AE} f(ACE) \sum_{BD} f(BCD)$ . This is more efficient to compute as the largest factor constructed in the process will be over 3 instead of 5 variables.

Suppose we eliminate variables according to order  $\pi$  when computing a marginal and let  $w + 1$  be the largest number of variables appearing in a factor constructed in the process. The time and space complexity of VE can then be bounded by  $O(n \cdot \exp(w))$  where  $n$  is the number of variables. The number  $w$  is called the *width* of order  $\pi$ . If the DAG has treewidth  $w$  then there must exist an elimination order of width  $w$ . Moreover, no elimination order can have a width less than  $w$ ; see [Darwiche, 2009, Ch 6 & 9] for a detailed exposition of these concepts and results.

## EXPLOITING UNKNOWN MECHANISMS

Two new theorems were added to VE by Darwiche [2020] which enabled the exploitation of unknown causal mechanisms. In the following three results, we will use  $\mathcal{F}, \mathcal{G}, \mathcal{H}$  to denote sets of factors, where each set is interpreted as a product of its factors. For example, the set of factors  $\mathcal{F}$  will be interpreted as the factor  $\prod_{f \in \mathcal{F}} f$ .

**Theorem 3** ([Darwiche, 2020]). *Let  $f$  be a mechanism for variable  $X$ . If  $f \in \mathcal{G}$  and  $f \in \mathcal{H}$ , then  $\mathcal{G} \cdot \mathcal{H} = \mathcal{G} \sum_X \mathcal{H}$ .*

According to this result, if a mechanism for  $X$  appears in both parts of a product, then variable  $X$  can be summed out from one part without changing the value of the product.

**Corollary 1** ([Darwiche, 2020]). *If  $f$  is a mechanism for  $X$ ,  $f \in \mathcal{G}$  and  $f \in \mathcal{H}$ , then  $\sum_X \mathcal{G} \cdot \mathcal{H} = (\sum_X \mathcal{G}) (\sum_X \mathcal{H})$ .*

That is, if a mechanism for  $X$  appears in both parts of a product, we can sum out variable  $X$  from the product by independently summing it out from each part. Corollary 1 may appear unusable as it is predicated on multiple occurrences of a mechanism whereas the factors of a Bayesian network contain a single mechanism for each variable. This is where the second theorem comes in: *replicating* (i.e., duplicating) mechanisms in a product does not change the product value.

**Theorem 4** ([Darwiche, 2020]). *For mechanism  $f$ , if  $f \in \mathcal{G}$ , then  $f \cdot \mathcal{G} = \mathcal{G}$ .*

Consider the factor  $\alpha = \sum_X f(XY)g(XZ)h(XW)$ . VE has to multiply factors  $f, g$  and  $h$  before summing out variable  $X$ , therefore constructing a factor over four variables  $XYZW$ . However, if factor  $f$  is a mechanism for variable  $X$ , then we can replicate it by Theorem 4:  $\alpha = f(XY)g(XZ)f(XY)h(XW)$ . Corollary 1 then gives  $\alpha = \sum_X f(XY)g(XZ) \sum_X f(XY)h(XW)$ . Hence, we can now compute factor  $\alpha$  without having to construct any factor over more than three variables. Moreover, we were able

---

### Algorithm 1 Complete Replication

---

```

1: procedure REPLICATE(DAG  $G$ , Functional nodes  $\Gamma$  in  $G$ )
2:    $\Sigma \leftarrow$  multi-set of family factors of  $G$ 
3:   for each node  $X$  in  $\Gamma$  (bottom-up traversal) do
4:     if  $X$  is a leaf then continue
5:      $n \leftarrow$  number of  $X$ -feeding factors in  $\Sigma$ 
6:      $\Sigma \leftarrow \Sigma \cup \{n - 1 \text{ copies of the family factor for } X\}$ 
7:   return  $\Sigma$ 

```

---

to do this without needing to know the function represented by factor  $f(XY)$ : we only needed to know that this factor represents a function from  $Y$  to  $X$ . As shown in [Darwiche, 2020], this technique can lead to exponential savings that are attained without needing to know the identity of mechanisms which is a major departure from earlier techniques.

As the above example shows, the exploitation of unknown mechanisms requires their replication (duplication). A specific replication strategy was mentioned briefly and informally in [Darwiche, 2020] and referred to as a “heuristic.” We shall call it the *complete replication strategy* for a reason that will become apparent later. This strategy is described formally in Algorithm 1 and uses the following definition.

**Definition 3.** *A family factor  $f(X, \mathbf{P})$  is said to be  $Y$ -feeding iff  $Y \in \mathbf{P}$ .*

Algorithm 1 works with a *multi-set* of factors  $\Sigma$  instead of a *set* since  $\Sigma$  may contain multiple copies of the same factor. It starts with  $\Sigma$  containing all family factors and traverses the DAG  $G$  bottom up. When visiting a functional node  $X$ , it adds replicas of the mechanism for  $X$  to  $\Sigma$ . Algorithm 1 returns what is called a *replication* of family factors.

**Definition 4.** *A replication of factors  $\mathcal{F}$  is a multi-set  $\mathcal{F}' \supseteq \mathcal{F}$  obtained by replicating some of the mechanisms in  $\mathcal{F}$ .*

Consider the DAG in Figure 3(a) where nodes  $B$  and  $C$  are functional. Calling Algorithm 1 on this DAG and these functional nodes returns the following replication  $f_A(A), f_B(AB), f_B(AB), f_B(AB), f_C(BC), f_C(BC), f_D(BCD), f_E(CE)$ , which contains three replicas of the mechanism for  $B$  and two replicas of the mechanism for  $C$ .

Even though a replication is technically a multi-set, we will simply refer to it as set for convenience. We will study (complete) mechanism replication extensively later.

A popular mechanization of VE is based on the notion of a *jointree*. We will review jointrees next as we shall use them to mechanize the exploitation of Theorems 3 and 4 and to formally define the notion of causal treewidth.

**Definition 5.** *A jointree for factors  $\mathcal{F}$  is a tree in which every leaf node  $i$  is assigned a non-empty set of factors  $\mathcal{F}_i$  where the sets  $\{\mathcal{F}_i\}_i$  form a partition of factors  $\mathcal{F}$ .<sup>3</sup>*

<sup>3</sup>Standard jointrees allow factors to be assigned to any node.

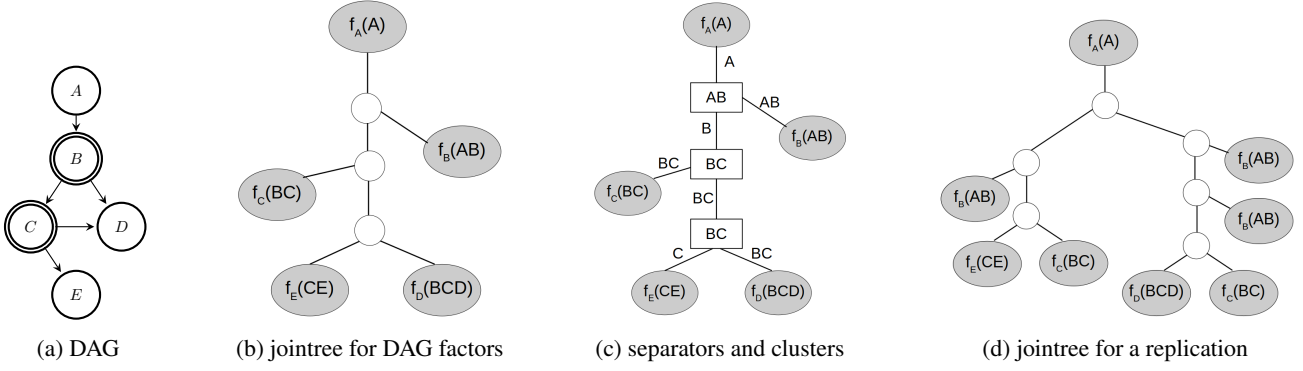

Figure 3: A DAG with a jointtree for its family factors (b,c) and a jointtree for a replication of these factors (d).

When a factor appears in  $\mathcal{F}_i$ , we will say that leaf node  $i$  *hosts* the factor. We will use  $\text{vars}(i)$  to denote the variables of factors  $\mathcal{F}_i$ . For a jointtree edge  $(i, j)$ , we will use  $\text{vars}(i, j)$  to denote the union of  $\text{vars}(k)$  for every leaf node  $k$  on the  $i$ -side of the edge. Figure 3(b) depicts a jointtree for the family factors of the DAG in Figure 3(a). Each leaf node of this jointtree hosts exactly one factor.

A jointtree induces edge and node labels as follows.

**Definition 6.** The *separator*  $S_{ij}$  of jointtree edge  $(i, j)$  is defined as  $\text{vars}(i, j) \cap \text{vars}(j, i)$ . If node  $i$  is a leaf, its *cluster*  $C_i$  is defined as  $\text{vars}(i)$ , otherwise as  $\bigcup_j S_{ij}$ . The *width* of a jointtree is the size of its largest cluster minus one.

Figure 3(c) depicts the separators and clusters for the jointtree in Figure 3(b). The width of this jointtree is 2 since its largest cluster has 3 variables.

Jointtrees play at least two key roles. First, their structure provides a specific recipe for when to multiply factors and when to sum out variables when applying VE. Second, their separators and clusters define the variables of factors constructed by VE so the sizes of these separators and clusters can be used to precisely determine the complexity of VE. We explain both roles next, starting with the following theorem which shows how a jointtree can be used to direct VE towards the computation of marginals over separators.

**Theorem 5.** Consider a jointtree for factors  $f_1, \dots, f_n$ . Define the *message* from jointtree node  $i$  to its neighbor  $j$  as:

$$\mathcal{M}_{ij} = \begin{cases} \sum_{\bar{S}_{ij}} \mathcal{F}_i & \text{for leaf node } i \\ \sum_{\bar{S}_{ij}} \prod_{k \neq j} \mathcal{M}_{ki} & \text{for internal node } i \end{cases}$$

For all jointtree edges  $(i, j)$ ,  $\mathcal{M}_{ij} \mathcal{M}_{ji} = \sum_{\bar{S}_{ij}} f_1, \dots, f_n$ .<sup>4</sup>

Assigning factors to leaves, even one factor per leaf, does not preclude jointtrees with optimal width; see [Darwiche, 2009, Ch 9].

<sup>4</sup>To compute the marginal over the family of variable  $X$ , choose a leaf node  $i$  in the jointtree which hosts the family factor for  $X$  and multiply this factor by message  $\mathcal{M}_{ji}$  where  $j$  is the single neighbor of  $i$ ; see [Darwiche, 2009, Ch 7].

Each message corresponds to a factor over some separator in the jointtree. Hence, separators determine the space complexity of the message-passing algorithm of Theorem 5. A message  $\mathcal{M}_{ij}$  can be computed in  $O(\exp(|C_i|))$  time and space given messages  $\mathcal{M}_{ki}$  for  $k \neq j$ . Since  $|C_i| \leq w + 1$ , where  $w$  is the jointtree width, all messages can be computed in  $O(n \cdot \exp(w))$  time and space where  $n$  is the number of jointtree factors. Given an elimination order of width  $w$ , one can always construct a jointtree of width  $\leq w$ ; see [Darwiche, 2009, Ch 9]. Hence, the mechanization of VE using jointtrees preserves the treewidth complexity bound.

In our context, jointtrees play a third key role as they provide a direct method for exploiting Theorems 3 and 4 as shown in [Darwiche, 2020]. Instead of computing a jointtree for the original set of factors  $\mathcal{F}$ , one computes a jointtree for a replication  $\mathcal{F}' \supseteq \mathcal{F}$  as licensed by Theorem 4; see Figure 3(d). One can then remove variables from separators and clusters in the expanded jointtree based on Theorem 3 while preserving the soundness of the message passing algorithm. This reduces the jointtree width and can lead to an exponential reduction in complexity. As in [Darwiche, 2021b], we refer to the process of removing variables from separators and clusters as the process of *thinning a jointtree*.<sup>5</sup> We will show in the next section that the thinning procedure in [Darwiche, 2020] is not complete as it can miss opportunities that are licensed by Theorem 3. We will also provide a complete thinning procedure (with respect to Theorem 3) which paves the way for the formal definition of causal treewidth.

## THINNING JOINTTREES

Suppose we have a replication  $\mathcal{F}' \supseteq \mathcal{F}$  of some factors  $\mathcal{F}$ . Given a jointtree for the replication  $\mathcal{F}'$ , we will next define the notion of a *jointtree thinning* and show that it is optimal (i.e., cannot be improved using Theorem 3). The replication  $\mathcal{F}'$  may not be optimal though. Constructing optimal replications will be discussed in the next section.

<sup>5</sup>The term “thin jointtree” was used earlier in the context of approximate inference [Bach and Jordan, 2001].

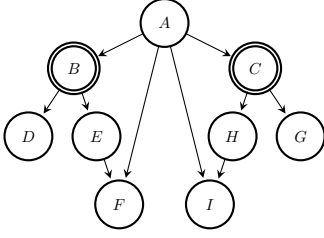

Figure 4: A Bayesian network with functional nodes  $B$  and  $C$ .

**Definition 7.** A jointtree node  $i$  is said to be  $X$ -connected to a factor  $f$  iff  $i$  hosts  $f$  or  $X$  appears in every separator on the path between  $i$  and some leaf node  $j$  that hosts factor  $f$ .

**Definition 8.** A jointtree thinning maps every edge  $(i, j)$  in the jointtree to a set of variables  $\mathbf{S}_{ij}^* \subseteq \mathbf{S}_{ij}$ , called a thinned separator, and satisfies two properties. First, for each functional variable  $X \in \mathbf{S}_{ij}^*$ , we have:

- (a) Node  $i$  is not  $X$ -connected to any  $X$ -mechanism on the  $i$ -side of edge  $(i, j)$ , or node  $j$  is not  $X$ -connected to any  $X$ -mechanism on the  $j$ -side of the edge.
- (b) If node  $i$  is not a leaf, then  $X \in \mathbf{S}_{ik}^*$  for some  $k \neq j$ .
- (c) If node  $j$  is not a leaf, then  $X \in \mathbf{S}_{jk}^*$  for some  $k \neq i$ .

Second, no other mapping from edges to supersets of  $\mathbf{S}_{ij}^*$  satisfies the above property.

The separators  $\mathbf{S}_{ij}$  of a jointtree are determined by the locations of factors (the leaf nodes they are hosted at). Hence, the separators of a jointtree are unique. However, a thinned separator  $\mathbf{S}_{ij}^*$  depends on both the locations of factors and other thinned separators. Hence, a jointtree may have multiple thinnings. We define next the quality of a jointtree thinning.

**Definition 9.** A jointtree thinning induces a thinned cluster  $\mathbf{C}_i^*$  for each jointtree node  $i$ : If  $i$  is a leaf,  $\mathbf{C}_i^* = \text{vars}(\mathcal{F}_i)$ ; otherwise,  $\mathbf{C}_i^* = \bigcup_j \mathbf{S}_{ij}^*$ . The width of a jointtree thinning is the size of its largest thinned cluster minus one.

A jointtree thinning leads to the notion of a causal jointtree.

**Definition 10.** A causal jointtree is a jointtree in which edges are annotated with thinned separators and nodes are annotated with thinned clusters. The causal width of a jointtree is the smallest width attained by any of its causal jointtrees.

The width of a jointtree can be determined by examining its cluster sizes. However, determining the causal width of a jointtree is more involved as, in principle, it requires examining all thinnings of the jointtree (causal jointtrees).

**Theorem 6.** The width of a jointtree thinning and the causal width of a jointtree are no greater than the jointtree width.

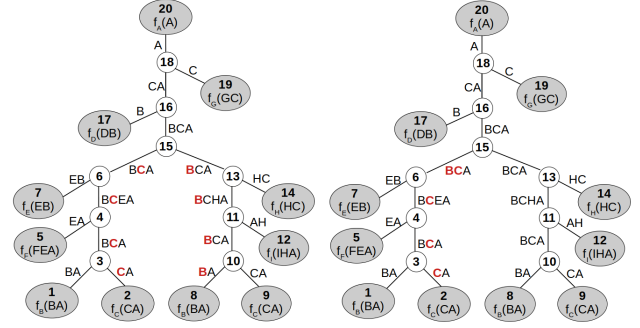

(a) jointtree thinning of width 2 (b) jointtree thinning of width 3

Figure 5: Two jointtree thinnings. Each edge  $(i, j)$  is marked by separator  $\mathbf{S}_{ij}$ . Red variables are not in the thinned separator  $\mathbf{S}_{ij}^*$ .

Figure 4 depicts a Bayesian network with two functional nodes ( $B, C$ ) and nine factors  $\mathcal{F} = f_A, f_B, \dots, f_I$ . Consider now the replication  $\mathcal{F}' \supseteq \mathcal{F}$  which results from duplicating mechanisms  $f_B$  and  $f_C$  once (that is,  $\mathcal{F}'$  has 11 factors). Figure 5 depicts a jointtree for the replication  $\mathcal{F}'$  and two of its thinnings according to Definition 8. The one in Figure 5(a) has width 2. The one in Figure 5(b) has width 3.

Using thinned separators as given by Definition 8 preserves the correctness of the message passing algorithm.

**Theorem 7.** Theorem 5 continues to hold if we use thinned separators  $\mathbf{S}_{ij}^*$  (as given by Definition 8) instead of classical separators  $\mathbf{S}_{ij}$  (as given by Definition 6).

The following result shows that we cannot improve Definition 8 of jointtree thinnings based only on Theorem 3.

**Theorem 8.** Consider a jointtree thinning (Definition 8). If we remove any functional variable from a thinned separator, then Theorem 3 will no longer be sufficient to prove the soundness of the message-passing algorithm (Theorem 5).

We next provide a characterization of jointtree thinnings, which is more suitable for verifying whether the removal of variables from classical separators leads to a valid thinning.

**Theorem 9.** A mapping from each jointtree edge  $(i, j)$  to variable set  $\mathbf{S}_{ij}^*$  is a jointtree thinning according to Definition 8 iff (1) for each non-functional variable  $X$ ,  $X \in \mathbf{S}_{ij}^*$  iff  $X \in \text{vars}(i, j) \cap \text{vars}(j, i)$ ; (2) for each functional variable  $X$ : (a) if  $X \in \text{vars}(i)$  for a leaf node  $i$ , then  $i$  is  $X$ -connected to exactly one mechanism for  $X$ ; (b) if  $X \in \mathbf{S}_{ij}^*$  for some non-leaf  $i$ , then  $X \in \mathbf{S}_{ik}^*$  for some  $k \neq j$ .

Definition 8 tells us what a thinning is but it does not tell us how to obtain one. We next provide a set of *thinning rules* that will generate every thinning admitted by Definition 8.

**Theorem 10.** We can obtain a jointtree thinning by starting with  $\mathbf{S}_{ij}^* = \mathbf{S}_{ij}$  and then removing variables from  $\mathbf{S}_{ij}^*$  according to the following rules, until no rules can be applied. Remove functional variable  $X$  from  $\mathbf{S}_{ij}^*$  if either



- (a) Node  $i$  is  $X$ -connected to some  $X$ -mechanism on the  $i$ -side of edge  $(i, j)$  and node  $j$  is  $X$ -connected to some  $X$ -mechanism on the  $j$ -side of the edge; or
- (b)  $X \notin \mathbf{S}_{ki}^*$  for all  $k \neq j$  when node  $i$  is not a leaf; or
- (c)  $X \notin \mathbf{S}_{jk}^*$  for all  $k \neq i$  when node  $j$  is not a leaf.

We will use  $R_a(i, j, X)$  to mean that Rule (a) is applicable to variable  $X$  and edge  $(i, j)$  and call it a *rule application*. Similarly for  $R_b(i, j, X)$  and  $R_c(i, j, X)$ . A jointree thinning can now be specified using a sequence of rule applications. The thinning in Figure 5(b) corresponds to  $R_a(6, 15, C)$ ,  $R_c(4, 6, C)$ ,  $R_c(3, 4, C)$ ,  $R_c(2, 3, C)$ ,  $R_a(6, 15, B)$ . The one in Figure 5(a) corresponds to  $R_a(6, 15, C)$ ,  $R_c(4, 6, C)$ ,  $R_c(3, 4, C)$ ,  $R_c(2, 3, C)$ ,  $R_a(13, 15, B)$ ,  $R_c(11, 13, B)$ ,  $R_c(10, 11, B)$ ,  $R_c(8, 10, B)$ .

**Definition 11.** A *thinning sequence* is a list of rule applications  $R^1, \dots, R^n$  where each rule is valid when it is applied and no rules are applicable after the sequence terminates.

Theorem 10 says that the thinning rules are sound. The next result says they are complete (with respect to Definition 8).

**Theorem 11.** Every causal jointree can be obtained using some thinning sequence.

Two distinct thinning sequences may yield the same jointree thinning since the order of applying rules may not matter in some cases. The following result suggests a restriction on thinning sequences that does not compromise their ability to discover every possible jointree thinning.

**Theorem 12.** Every jointree thinning can be obtained by a thinning sequence in which all applications of Rule (a) come before the applications of Rules (b,c).

That is, we can first exhaust all applications of Rule (a) and then apply Rules (b,c). In fact, once we exhaust all applications of Rule (a), applying Rules (b,c) becomes deterministic. In other words, the jointree thinning obtained by a thinning sequence is fully determined by its Rules (a).

Thinning sequences mechanize the thinning process but finding an optimal thinning sequence remains a computationally challenging task given the large number of such sequences (even under the above restriction). Hence, one needs either sophisticated search algorithms or a heuristic to decide which thinning rule to apply and when. One heuristic that we found effective is to prefer  $R_a(i, j, X)$  with the largest  $\mathbf{S}_{ij}^*$ , followed by  $X$  that is contained in the fewest neighboring separators, followed by minimizing the number of  $X$ -connected  $X$ -mechanisms on either side of edge  $(i, j)$ .

[Darwiche, 2020] proposed three thinning rules that apply only to binary jointrees in which each node has one or three neighbors [Shenoy, 1996]. The rules are not complete though as they can miss thinnings admitted by Definition 8. As in the rules we defined above, one starts by setting

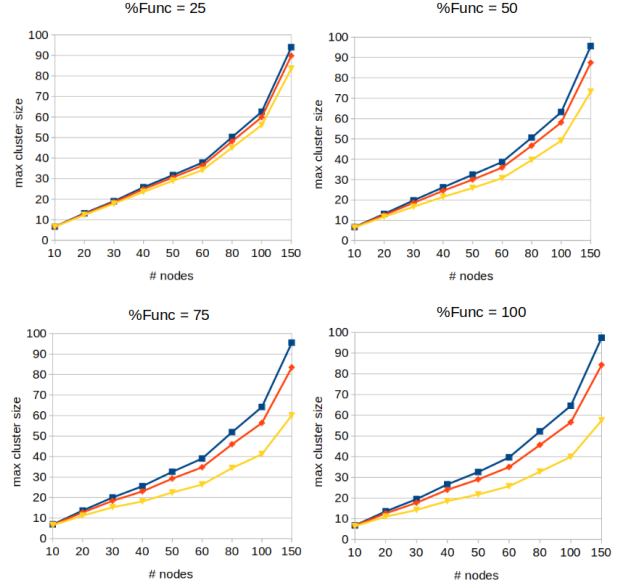

Figure 6: Comparing the thinning rules in Theorem 10 with the ones in [Darwiche, 2020]. Functional nodes are restricted to be internal (non-root) nodes. The average time for applying the new thinning rules to networks with 150 variables and 100% functional (hardest configuration) is 6.86 sec, with a min/max time of 0.8/28.8 sec.

thinned separators  $\mathbf{S}_{ij}^*$  to classical separators  $\mathbf{S}_{ij}$  and then tries to remove variables from  $\mathbf{S}_{ij}^*$  using the rules. However, these rules can only be applied when visiting the jointree nodes in a particular order. A leaf node  $h$  is identified first and then nodes are visited based on their distance from  $h$ , where the closer nodes are visited first. Suppose we are visiting a non-leaf node  $i$ . Let  $p$  be its neighbor that is closest to leaf  $h$  and let  $c_1$  and  $c_2$  be its two other neighbors. The first two rules require the following conditions:  $X \in \mathbf{S}_{ic_1}^*$ ,  $X \in \mathbf{S}_{ic_2}^*$ , an  $X$ -mechanism is hosted on the  $c_1$ -side of edge  $(c_1, i)$  and an  $X$ -mechanism is hosted on the  $c_2$ -side of edge  $(c_2, i)$ . If we further have  $X \in \mathbf{S}_{ip}^*$ , the first rule licenses the removal of  $X$  from either  $\mathbf{S}_{ic_1}^*$  or  $\mathbf{S}_{ic_2}^*$ . If  $X \notin \mathbf{S}_{ip}^*$ , the second rule licenses the removal of  $X$  from both  $\mathbf{S}_{ic_1}^*$  and  $\mathbf{S}_{ic_2}^*$ . The final rule applies to the single neighbor  $r$  of leaf  $h$ , allowing us to remove variable  $X$  from  $\mathbf{S}_{hr}^*$  when an  $X$ -mechanism is hosted at leaf  $h$  and also at some other leaf in the jointree. The first rule involves a choice which is made using a heuristic described in [Darwiche, 2020].

Consider now the Bayesian network in Figure 4 and its thinned jointree in Figure 5(a) which has width 2. The best thinning that can be obtained by the rules in [Darwiche, 2020] has width 3, regardless of which leaf node  $h$  we choose and regardless of what choices we make when applying the first rule. Figure 6 depicts a comparison between these rules and the ones in Theorem 10 on random (binary) jointrees, for the factors of complete replications generated by Algorithm 1. The plots in this figure vary the number of

Bayesian network nodes from 10 to 150 and consider different percentages of functional nodes (25, 50, 75 and 100) which are restricted to be non-root nodes.<sup>6</sup> They report the mean of maximal cluster size (width+1) over 10 jointrees for each data point. The plots are for the cluster sizes of (1) a classical jointree (blue), (2) a causal jointree obtained by the incomplete rules (red) and (3) a causal jointree obtained by the proposed rules (yellow). Four patterns are clear: more thinning takes place as we increase the number of functional nodes; the proposed thinning rules are much more effective; the gap between the two sets of rules grows as we increase the number of Bayesian network nodes and the number of functional nodes; the exploitation of unknown mechanisms can lead to significant reduction in inference complexity.

## MECHANISM REPLICATION

The definition of thinning that we developed in the previous section was with respect to a particular replication  $\mathcal{F}$  and a particular jointree for the factors in  $\mathcal{F}$ . Some replications are better than others in that they lead to causal jointrees of smaller width. We formalize this next.

**Definition 12.** The *width* of a replication  $\mathcal{F}$  is defined as the minimum width attained by any causal jointree for  $\mathcal{F}$ .

Given a replication  $\mathcal{F}$ , we need to examine two search spaces before we can determine its width. First, we must choose a jointree for the factors in  $\mathcal{F}$ . Second, we must choose a particular thinning of the jointree. Hence, determining the width of a replication is not a straightforward task. Moreover, the width of a replication is not the only measure of its quality as we need to also consider its size. This is a critical issue that was not discussed in [Darwiche, 2020, 2021b] and that we need to explore carefully before we are ready to provide the formal definition of causal treewidth.

The size of a replication is the number of factors it contains (replicas are counted individually). To highlight the importance of a replication size, consider two replications  $\mathcal{F}_1$  and  $\mathcal{F}_2$  with respective sizes  $n_1$  and  $n_2$ . Suppose now that replication  $\mathcal{F}_1$  has width  $w_1$  and replication  $\mathcal{F}_2$  has width  $w_2$ . This means that there exists a causal jointree for replication  $\mathcal{F}_1$  of width  $w_1$  and no other causal jointree can have a smaller width (and similarly for replication  $\mathcal{F}_2$ ). If we use these optimal causal jointrees, inference using these replications can be done in  $O(n_1 \cdot \exp(w_1))$  and  $O(n_2 \cdot \exp(w_2))$  time and space, respectively. One may be tempted to choose the replication with smaller width since complexity is exponential in width but linear in size. However, the size of

<sup>6</sup>Our method for generating a Bayesian network with nodes  $X_1, \dots, X_n$  assumes that each node has at most five parents. We visit nodes  $X_i$  from  $i = 1$  to  $i = n$ . When visiting node  $X_i$ , we randomly choose a number from  $\{0, \dots, \min(5, i - 1)\}$  to represent the number of parents for  $X_i$  and then randomly choose that many parents from  $X_1, \dots, X_{i-1}$ .

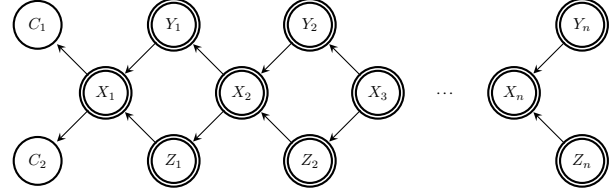

Figure 7: A DAG with an exponential complete replication.

a replication may also be exponential as we show next. In fact, the key result of this section is that the replication strategy proposed in [Darwiche, 2020], shown in Algorithm 1, satisfies two interesting properties. First, it is optimal: no other replication strategy will have a smaller width. Second, it can lead to replications of exponential size. We will in fact provide a bound on the size of replications produced by this strategy and suggest how it can be improved to avoid a blow up in replication size.

We start with the following result which shows that excessive replication can never hurt width.

**Theorem 13.** Consider two replications  $\mathcal{F}_1$  and  $\mathcal{F}_2$  of some factors  $\mathcal{F}$  where  $\mathcal{F} \subseteq \mathcal{F}_1 \subseteq \mathcal{F}_2$ . If the width of replication  $\mathcal{F}_1$  is  $w$ , then the width of replication  $\mathcal{F}_2$  is  $\leq w$ .

We next identify a class of replications that possess some significant properties.

**Definition 13.** A replication  $\mathcal{F}$  is *complete* iff it satisfies the following property for each functional variable  $X$  and its mechanism  $f_X$ . If  $n$  is the number of  $X$ -feeding factors in  $\mathcal{F}$  and  $n > 0$ , then  $\mathcal{F}$  contains  $n$  replicas of mechanism  $f_X$ . Otherwise,  $\mathcal{F}$  contains only one replica of  $f_X$ .

The first property of complete replications is uniqueness.

**Theorem 14.** The family factors of any DAG have a unique complete replication. Moreover, the replications generated by Algorithm 1 are complete.

The second property of complete replications is optimality.

**Theorem 15.** Let  $\mathcal{F}$  and  $\mathcal{F}'$  be two replications of the family factors of a DAG. If replication  $\mathcal{F}$  is complete, then its width is no greater than the width of replication  $\mathcal{F}'$ .

The third property of complete replications is that their size can be exponential. Consider the family of DAGs in Figure 7 which have  $3n + 2$  nodes for  $n \geq 1$ . Algorithm 1, which generates complete replications, starts with a set  $\Sigma$  containing the  $3n + 2$  family factors. It then visits functional nodes bottom-up and replicates their mechanisms. One can easily show that after visiting functional node  $X_i$ , the set  $\Sigma$  will contain  $2^i$  replicas of the mechanism for  $X_i$ .

We next provide a bound on the number of factors in a complete replication which suggests a method for controlling the potential blow up in its size.



**Definition 14.** A *functional chain* of length  $k$  in a DAG is a set of functional nodes  $n_1, \dots, n_k$  where node  $n_i$  is a parent of node  $n_{i+1}$  for  $i = 1, \dots, k - 1$ .

**Theorem 16.** Consider a DAG with  $n$  nodes. Let  $c$  be the largest number of children for any node and let  $k$  be the length of longest functional chain. The (unique) complete replication of this DAG will contain at most  $nc^k$  factors.

This bound immediately provides a method for controlling the number of replicas in a complete replication. If we treat variable  $X_{n/2}$  in Figure 7 as a non-functional variable, the length of the largest functional chain will be cut by half. Hence, by selectively ignoring some functional variables we can bound the size of functional chains and therefore ensure that Algorithm 1 will produce replications with size that is polynomial in the number of DAG nodes.

We are now ready to define causal treewidth formally.

**Definition 15.** Consider a DAG  $G$  with  $n$  nodes, some of which are declared as functional. The *causal treewidth* of DAG  $G$  is the smallest width attained by any replication  $\mathcal{F}$  for  $G$  where the size of  $\mathcal{F}$  is polynomial in  $n$ .

For the class of DAGs with bounded functional chains, one can use the complete replication  $\mathcal{F}$  to determine the causal treewidth of the DAG. That is, determining causal treewidth becomes a matter of finding an optimal causal jointree for the factors in  $\mathcal{F}$ . The situation is more intricate for DAGs with unbounded functional chains. The complete replication cannot be used in this case and one must search among replications of polynomial size. It remains to be seen whether the space of replications to be explored can be restricted to subsets of the complete replication as suggested earlier. This is a subject of future work. We note here that [Darwiche, 2021b] identified a family of DAGs with  $O(n^2)$  nodes, bounded depth and treewidth  $n + 1$ , while constructing thinned jointrees of width 2 for the family, assuming all internal nodes are functional. This is an example where the treewidth is unbounded while the causal treewidth is bounded, showing that causal treewidth dominates treewidth.

The appendix contains an experiment that reveals the importance of replication strategies and how such strategies interact with jointree construction methods. The experiment exhibited a number of patterns. First, the causal width was always smaller than the width, and quite substantially smaller, even when using random replications. Next, complete replications always produced a smaller causal width compared to random replications, particularly when the number of functional nodes is largest (100%). Finally, increasing the size of a random replication almost always correlated with decreasing the causal width but up to a certain point after which increasing the size of a replication did not help.

## CONCLUSION

We provided a formal definition of the notion of causal treewidth, which dominates the classical and influential notion of treewidth. We also studied the three ingredients needed to define causal treewidth: mechanism replication, jointree construction and jointree thinning which yields causal jointrees. On the first front, we presented a number of results about a replication strategy that we called complete replication, showing that it is optimal while providing a bound on the size of replications it produces and suggesting a technique for controlling their size. On the second front, we highlighted the relevance (and irrelevance) of classical jointree construction methods to the construction of jointrees for replications. On the third front, we provided a complete characterization of causal jointrees and provided three thinning rules that are sound and complete for generating causal jointrees. We also proved some properties of these rules which can be of practical significance. We finally presented some experimental results to shed further light on the developments in this paper, which also showed that causal jointrees can lead to exponential improvements in the complexity of inference in comparison to jointrees.

## Acknowledgements

We wish to thank Yunqiu Han for useful feedback. This work has been partially supported by NSF grant #ISS-1910317 and ONR grant #N00014-18-1-2561.

## References

- Durgesh Agrawal, Yash Pote, and Kuldeep S. Meel. Partition function estimation: A quantitative study. In *IJCAI*, pages 4276–4285. ijcai.org, 2021.
- Francis R. Bach and Michael I. Jordan. Thin junction trees. In *NIPS*, pages 569–576. MIT Press, 2001.
- Hans L. Bodlaender. Treewidth: Characterizations, applications, and computations. In *WG*, volume 4271 of *Lecture Notes in Computer Science*, pages 1–14. Springer, 2006.
- Craig Boutilier, Nir Friedman, Moisés Goldszmidt, and Daphne Koller. Context-specific independence in bayesian networks. In *UAI*, pages 115–123. Morgan Kaufmann, 1996.
- Mark Chavira and Adnan Darwiche. Compiling Bayesian networks with local structure. In Leslie Pack Kaelbling and Alessandro Saffiotti, editors, *IJCAI-05, Proceedings of the Nineteenth International Joint Conference on Artificial Intelligence, Edinburgh, Scotland, UK, July 30 - August 5, 2005*, pages 1306–1312. Professional Book Center, 2005. URL <http://ijcai.org/Proceedings/05/Papers/0931.pdf>.

- Mark Chavira and Adnan Darwiche. On probabilistic inference by weighted model counting. *Artif. Intell.*, 172(6-7):772–799, 2008. doi: 10.1016/j.artint.2007.11.002. URL <https://doi.org/10.1016/j.artint.2007.11.002>.
- Mark Chavira, Adnan Darwiche, and Manfred Jaeger. Compiling relational Bayesian networks for exact inference. *Int. J. Approx. Reason.*, 42(1-2):4–20, 2006.
- Yizuo Chen, Arthur Choi, and Adnan Darwiche. Supervised learning with background knowledge. In *PGM*, volume 138 of *Proceedings of Machine Learning Research*, pages 89–100. PMLR, 2020.
- Adnan Darwiche. A differential approach to inference in Bayesian networks. *J. ACM*, 50(3):280–305, 2003.
- Adnan Darwiche. *Modeling and Reasoning with Bayesian Networks*. Cambridge University Press, 2009.
- Adnan Darwiche. An advance on variable elimination with applications to tensor-based computation. In *ECAI*, volume 325 of *Frontiers in Artificial Intelligence and Applications*, pages 2559–2568. IOS Press, 2020.
- Adnan Darwiche. Tractable Boolean and arithmetic circuits. In Pascal Hitzler and Md Kamruzzaman Sarker, editors, *Neuro-Symbolic Artificial Intelligence: The State of the Art*, volume 342 of *Frontiers in Artificial Intelligence and Applications*. IOS Press, 2021a. <https://arxiv.org/abs/2202.02942>.
- Adnan Darwiche. Causal inference with tractable circuits. In *Why-21 Workshop, NeurIPS*, 2021b. <https://arxiv.org/abs/2202.02891>.
- Rina Dechter. Bucket elimination: A unifying framework for probabilistic inference. In *Proceedings of the Twelfth Annual Conference on Uncertainty in Artificial Intelligence (UAI)*, pages 211–219, 1996.
- Rina Dechter. *Constraint processing*. Elsevier Morgan Kaufmann, 2003.
- F. V. Jensen, S. Lauritzen, and K. Olesen. Bayesian updating in recursive graphical models by local computation. *Computational Statistics Quarterly*, 4:269–282, 1990.
- David Larkin and Rina Dechter. Bayesian inference in the presence of determinism. In *Proceedings of the Ninth International Workshop on Artificial Intelligence and Statistics (AISTATS)*, 2003.
- Judea Pearl. *Causality*. Cambridge University Press, 2000.
- Judea Pearl and Dana Mackenzie. *The Book of Why: The New Science of Cause and Effect*. Basic Books, 2018.
- Neil Robertson and Paul D. Seymour. Graph minors. II. algorithmic aspects of tree-width. *J. Algorithms*, 7(3):309–322, 1986.
- Prakash P. Shenoy. Binary join trees. In *UAI*, pages 492–499. Morgan Kaufmann, 1996.
- Marco Zaffalon, Alessandro Antonucci, and Rafael Cabañas. Causal expectation-maximisation. In *NIPS, NeurIPS 2021 WHY-21 Workshop*, 2021.
- Nevin Lianwen Zhang and David Poole. Exploiting causal independence in bayesian network inference. *Journal of Artificial Intelligence Research*, 5:301–328, 1996.

## PROOFS

Our proofs are ordered slightly differently than the corresponding results in the paper as we need some results when proving others. In the upcoming proofs, we will also use  $f_X$  to denote a mechanism for variable  $X$ . We will also say that a leaf node  $i$  in a jointree *contains* variable  $X$  iff  $X$  appears in a factor that is hosted at leaf node  $i$ .

### PROOF OF THEOREM 5

See [Darwiche, 2009, Ch 7].

### PROOF OF THEOREM 6

Follows directly from Definitions 9 and 10.

### PROOF OF THEOREM 10

In this proof, we will assume we have a mapping from jointree edges  $(i, j)$  to sets  $\mathbf{S}'_{ij} \subseteq \mathbf{S}_{ij}$  that satisfy conditions (a,b,c) of Definition 8 (that is, these sets satisfy only the first part of this definition but not the second part so they are not necessarily thinned separators). We will also say that jointree nodes  $i$  and  $j$  are  $(X, \mathbf{S}')$ -connected iff  $i = j$  or variable  $X$  appears in every set  $\mathbf{S}'$  that is attached to an edge on the path between  $i$  and  $j$ . We will first state and prove two lemmas which we need for the proof of this theorem.

**Lemma 1.** *If  $X \in \mathbf{S}'_{ij}$ , then node  $i$  is  $(X, \mathbf{S}')$ -connected to some leaf node on the  $i$ -side of edge  $(i, j)$  which contains variable  $X$  and node  $j$  is  $(X, \mathbf{S}')$ -connected to some leaf node on the  $j$ -side of the edge which also contains  $X$ .*

*Proof.* Suppose node  $i$  is not  $(X, \mathbf{S}')$ -connected to some leaf node on the  $i$ -side of edge  $(i, j)$  which contains  $X$ . Consider a longest path  $i, \dots, r, l$  on the  $i$ -side of the edge such that  $X$  appears in  $\mathbf{S}'$  for each edge on the path. If  $l$  is a leaf node, then it must contain variable  $X$  by definition of separators, which is a contradiction. Suppose now that  $l$  is not a leaf node. Then  $X \notin \mathbf{S}'_{lk}$  for  $k \neq r$ , otherwise the path would not be longest. This contradicts the assumed condition (b) of Definition 8 on sets  $\mathbf{S}'$ . Hence, node  $i$  must be  $(X, \mathbf{S}')$ -connected to some leaf node that contains  $X$  on the  $i$ -side of edge  $(i, j)$ . We can similarly show the second part of the lemma.  $\square$

**Lemma 2.** *Suppose sets  $\mathbf{S}'_{ij}$  were obtained by exhausting thinning rules on separators  $\mathbf{S}_{ij}$ . If node  $k$  is  $(X, \mathbf{S}')$ -connected to some leaf node that contains  $X$ , then node  $k$  is  $(X, \mathbf{S}')$ -connected to exactly one leaf node that hosts  $f_X$ .*

*Proof.* Suppose node  $k$  is  $(X, \mathbf{S}')$ -connected to some leaf node that contains  $X$ . Then node  $k$  cannot be  $(X, \mathbf{S}')$ -

connected to more than one leaf node hosting  $f_X$ ; otherwise, Rule (a) will apply. We next show that node  $k$  must be  $(X, \mathbf{S}')$ -connected to at least one mechanism  $f_X$ . We will show this by induction on the number of rule applications. We will use  $\mathbf{S}^n$  to denote the state of separators after the  $n^{\text{th}}$  rule application. For the base case (before any thinning rules are applied), node  $k$  must be  $(X, \mathbf{S}^0)$ -connected to some  $f_X$  by the definition of separators in a jointree. For the inductive step, suppose node  $k$  is  $(X, \mathbf{S}^n)$ -connected to some leaf node that contains  $X$  only if node  $k$  is  $(X, \mathbf{S}^n)$ -connected to at least one leaf node that hosts  $f_X$ . Suppose now that node  $k$  is  $(X, \mathbf{S}^{n+1})$ -connected to some leaf node that contains  $X$ . We will next show that node  $k$  must be  $(X, \mathbf{S}^{n+1})$ -connected to at least one mechanism  $f_X$ .

First, node  $k$  must be  $(X, \mathbf{S}^n)$ -connected to some leaf node that contains  $X$ . Hence, by the induction hypothesis, node  $k$  must be  $(X, \mathbf{S}^n)$ -connected to at least one mechanism  $f_X$ . We will consider an edge  $(i, j)$  such that  $X \in \mathbf{S}^n_{ij}$  and  $X \notin \mathbf{S}^{n+1}_{ij}$  (such an edge must exist) and do a case analysis on which rule applied to this edge.

Case: Rule (a). We will show next that node  $k$  must be  $(X, \mathbf{S}^{n+1})$ -connected to at least one mechanism  $f_X$  while assuming that node  $k$  is on the  $i$ -side of edge  $(i, j)$ . A similar argument will show the same if node  $k$  is on the  $j$ -side of the edge. Suppose node  $k$  is on the  $i$ -side of edge  $(i, j)$ . If node  $k$  is  $(X, \mathbf{S}^n)$ -connected to some  $f_X$  on the  $i$ -side, then node  $k$  is  $(X, \mathbf{S}^{n+1})$ -connected to the same  $f_X$  on the  $i$ -side. If node  $k$  is  $(X, \mathbf{S}^n)$ -connected to some  $f_X$  on the  $j$ -side, then node  $k$  is  $(X, \mathbf{S}^{n+1})$ -connected to node  $i$ . By the definition of Rule (a), node  $i$  must be  $(X, \mathbf{S}^{n+1})$ -connected to some  $f_X$  on the  $i$ -side. Therefore, node  $k$  must be  $(X, \mathbf{S}^{n+1})$ -connected to the same  $f_X$  on the  $i$ -side.

Case: Rule (b). Then none of the neighboring separators except  $\mathbf{S}^n_{ij}$  contains  $X$ . If node  $k$  is on the  $i$ -side, then node  $k$  must be  $(X, \mathbf{S}^n)$  to some  $f_X$  on the  $i$ -side and therefore must be  $(X, \mathbf{S}^{n+1})$  to the same  $f_X$  on the  $i$ -side. The same argument applies if node  $k$  is on the  $j$ -side.

Case: Rule (c). Symmetric to the previous case.  $\square$

*Proof of Theorem 10.* First note that conditions (a,b,c) of Definition 8 hold when we exhaust thinning rules. Suppose sets  $\mathbf{S}'_{ij}$  were obtained by exhausting thinning rules on separators  $\mathbf{S}_{ij}$  (and hence satisfy the three conditions). We just need to prove that no supersets of  $\mathbf{S}'_{ij}$  satisfy these conditions. Suppose by contradiction such supersets  $\mathbf{S}''_{ij}$  exist and consider an edge  $(i, j)$  such that  $X \in \mathbf{S}''_{ij}$  and  $X \notin \mathbf{S}'_{ij}$ . By Lemma 1 since sets  $\mathbf{S}''_{ij}$  satisfy the three conditions, node  $i$  must  $(X, \mathbf{S}'')$ -connect to some leaf node  $k$  on the  $i$ -side which contains  $X$ . Since leaf node  $k$  contains  $X$ , it  $(X, \mathbf{S}')$ -connects to itself. By Lemma 2, the leaf node  $k$  is  $(X, \mathbf{S}')$ -connected to some  $f_X$  on the  $i$ -side since  $X \notin \mathbf{S}'_{ij}$ . Hence, leaf node  $k$  is also  $(X, \mathbf{S}'')$ -connected to the same  $f_X$  on the  $i$ -side since sets  $\mathbf{S}''_{ij}$  are supersets of  $\mathbf{S}'_{ij}$ . We

have shown that node  $i$  is  $(X, S'')$ -connected to leaf node  $k$  which is  $(X, S'')$ -connected to some  $f_X$  on the  $i$ -side, therefore node  $i$  is  $(X, S'')$ -connected to some  $f_X$  on the  $i$ -side. By a similar argument, node  $j$  is  $(X, S'')$ -connected to some  $f_X$  on the  $j$ -side. However, this implies that the supersets  $S''_{ij}$  violate condition (a), which is a contradiction. Hence, the supersets  $S''_{ij}$  cannot exist.  $\square$

## PROOF OF THEOREM 11

We need the following lemma which states the same property of Lemma 2 except under different conditions. The proof of this lemma uses the notion of “a closest leaf  $k$  to node  $i$  which hosts mechanism  $f_X$ .” This is a leaf node that hosts  $f_X$  where the path  $i = p_0, p_1, \dots, p_{n-1}, p_n = k$  has a minimal number of sets  $S^*_{p_i p_{i+1}}$  that do not contain  $X$ .

**Lemma 3.** *Consider thinned separators  $S^*$  according to Definition 8 and let  $X$  be a functional variable. If node  $i$  is  $(X, S^*)$ -connected to some leaf node that contains  $X$ , then node  $i$  is  $(X, S^*)$ -connected to exactly one leaf node that hosts mechanism  $f_X$ .*

*Proof.* Suppose node  $i$  is  $(X, S^*)$ -connected to some leaf node that contains  $X$ . Node  $i$  cannot be  $(X, S^*)$ -connected to two different leaves that host  $f_X$  as this would violate condition (a) of Definition 8. Suppose now that node  $i$  is not  $(X, S^*)$ -connected to any mechanism  $f_X$ . We will next show a contradiction. Consider the path  $i = p_0, p_1, \dots, p_{n-1}, p_n = k$  where  $k$  is a closest leaf to node  $i$  which hosts mechanism  $f_X$ . We claim that adding  $X$  to all sets  $S^*_{p_i p_{i+1}}$  which do not contain  $X$  on the path results in a jointree thinning that still satisfies conditions (a,b,c) of Definition 8. This would be a contradiction as it implies there is a superset of thinning  $S^*$  that satisfies these conditions.

To show the above claim, note that conditions (b,c) will immediately continue to be satisfied if we add variables to sets  $S^*_{p_i p_{i+1}}$ . We next show that condition (a) will continue to be satisfied as well.

Suppose we are adding  $X$  to sets  $S^*_{p_i p_{i+1}}$  which do not contain variable  $X$  using the given order of these sets. Let  $S'$  be the separators after adding  $X$  to  $S^*_{p_i p_{i+1}}$  when the first violation to condition (a) takes place. Then node  $p_i$  will be  $(X, S')$ -connected to a leaf node  $p'_i$  that hosts mechanism  $f_X$  on the  $p_i$ -side of edge  $(p_i, p_{i+1})$ . This contradicts with the definition of  $k$  as  $p'_i$  will be closer to  $i$  than  $k$ .  $\square$

*Proof of Theorem 11.* Given a jointree thinning  $S^*$  that satisfies Definition 8, we will next show how to construct a thinning sequence that produces it.

A key observation is that rule applications for a variable  $X$  are independent of rule applications for a variable  $Y \neq X$ ; that is, we can always rearrange a thinning sequence so rules that apply to the same variable are consecutive. Hence,

we will construct a thinning sequence that produces  $S^*$  by constructing a set of rule applications for each variable and then paste them together.

To construct the rule applications for variable  $X$ , we start with some leaf node  $l$  which hosts mechanism  $f_X$  and then traverse nodes away from  $l$ . Suppose we are visiting node  $i$  now which has a neighbor  $j$  that has not been visited. If  $X \notin S^*_{ij}$  and  $X \in S_{ij}$ , we consider two cases. If  $X \notin S^*_{jk}$  for all  $k$ , we add  $R_c(i, j, X)$ . Otherwise, we add  $R_a(i, j, X)$ . Every variable that has been thinned will now be accounted for by a rule. Moreover, these rules will be applicable in the reverse order in which they have been constructed. Each  $R_a(i, j, X)$  will be applicable by Lemmas 1 and 3. Each  $R_c(i, j, X)$  will be applicable by definition.  $\square$

## PROOF OF THEOREM 9

*Proof.* A jointree thinning according to Definition 8 satisfies the two properties of the theorem by Definition 8 and Lemma 3. Suppose now the two properties hold for a mapping  $S^*$ . We will show there exists a thinning sequence that produces  $S^*$  from the classical separators  $S$ . We first note that no thinning rules can be applied to a mapping  $S^*$  that satisfies the two properties of the theorem. To apply thinning rules to separators  $S$ , we consider each functional variable  $X$ , then locate all connected subtrees where  $X$  does not appear in any separator of a subtree. Consider one such connected subtree  $\Gamma$  and let  $B = \{S^*_{u_1 t_1}, \dots, S^*_{u_k t_k}\}$  be the boundary separators of the subtree. WLG, assume  $u_i$  are at the subtree boundary. Observe that each  $u_i$  can either be a leaf node that hosts a mechanism  $f_X$  or a non-leaf node such that  $X \in S^*_{u_i r_i}$  for  $r_i \neq t_i$ . Similar to the proof for Lemma 1, we can show that each  $u_i$  is  $(X, S^*)$ -connected to some  $f_X$ . Let  $\{S_{u_1 t_1}, \dots, S_{u_k t_k}\}$  be the original classical separators of the jointree, then the separators  $S^*$  for the connected subtree  $\Gamma$  can be obtained by the following thinning sequence. We first apply thinning Rule (a) to all boundary separators  $S_{u_1 t_1}, \dots, S_{u_k t_k}$  but one. Suppose we apply the rule to separators  $S_{u_2 t_2}, \dots, S_{u_k t_k}$ . This is sound since  $u_1$  is  $(X, S)$ -connected to all  $u_2, \dots, u_k$  by the property of classical separators. Starting from these thinned boundary separators, we can then thin  $X$  from all separators in subtree  $\Gamma$  using Rules (b,c).  $\square$

## PROOF OF THEOREM 8

*Proof.* Suppose  $S^*$  is a jointree thinning according to Definition 8 and let  $X$  be a functional variable such that  $X \in S^*_{ij}$  for some edge  $(i, j)$ . By Theorem 9, we must have some leaf node  $k$  with  $X \in \text{vars}(i)$  that is  $X$ -connected to exactly one mechanism for  $X$ ,  $f_X$ , through edge  $(i, j)$ . WLG, suppose leaf  $k$  is on the  $i$ -side of the edge and mechanism  $f_X$  is on the  $j$ -side of the edge. Suppose further that we remove variable  $X$  from  $S^*_{ij}$  leading to new separators  $S'$ .

This will lead to a violation of Condition (2a) in Theorem 9. In particular, leaf node  $k$  will no longer be  $X$ -connected to any mechanism for  $X$ . Now let  $\mathcal{F}$  be the factors on the  $i$ -side of edge  $(i, j)$ ,  $\mathcal{G}$  be the factors on the  $j$ -side of the edge and  $m$  be the number of mechanisms  $f_X$  in  $\mathcal{F} \cup \mathcal{G}$ . Let  $\mathcal{M}^*$  denote messages computed using separators  $\mathbf{S}^*$  and  $\mathcal{M}'$  denote the messages computed using the separators  $\mathbf{S}'$ . The computation of messages  $\mathcal{M}_{ij}^*$  and  $\mathcal{M}_{ji}^*$  must involve at least  $m-1$  distinct sum-outs of  $X$ . This follows because the mechanisms  $f_X$  cannot be  $X$ -connected. Since  $\mathcal{M}_{ij}' = \sum_X \mathcal{M}_{ij}^*$  and  $\mathcal{M}_{ji}' = \sum_X \mathcal{M}_{ji}^*$ , computing the product  $\mathcal{M}_{ij}' \cdot \mathcal{M}_{ji}'$  involves  $(m-1) + 2 = m+1$  distinct sum-outs of variable  $X$ . If  $\Pr(\mathbf{S}_{ij}') = \sum_{\mathbf{S}_{ij}'} \mathcal{F} \cdot \mathcal{G} = \mathcal{M}_{ij}' \cdot \mathcal{M}_{ji}'$  then  $\mathcal{M}_{ij}' \cdot \mathcal{M}_{ji}'$  is a factorization of  $\sum_{\mathbf{S}_{ij}'} \mathcal{F} \cdot \mathcal{G}$  that involves  $m+1$  distinct sum-outs of variable  $X$ . However, since factors  $\mathcal{F} \cup \mathcal{G}$  contain exactly  $m$  replicas of mechanism  $f_X$ , any factorization of  $\sum_{\mathbf{S}_{ij}'} \mathcal{F} \cdot \mathcal{G}$  cannot include more than  $m$  distinct sum-outs of variable  $X$  that are based on Theorems 2 and 3. This follows because each sum-out of  $X$  based on Theorem 3 will consume a mechanism  $f_X$  and the sum-outs based on Theorem 2 do not consume mechanisms. Hence, the equality  $\sum_{\mathbf{S}_{ij}'} \mathcal{F} \cdot \mathcal{G} = \mathcal{M}_{ij}' \cdot \mathcal{M}_{ji}'$  cannot be justified based only on these two theorems. That is, Theorem 3 will no longer be sufficient to imply the soundness of the message-passing algorithm as stated in Theorem 5.  $\square$

## PROOF OF THEOREM 12

**Lemma 4.** Consider a thinning sequence  $\mathbf{R} = \{\mathbf{X}, R_k, \mathbf{Y}, R_t, \mathbf{Z}\}$  where  $\mathbf{X} = \{R_1, \dots, R_{k-1}\}$ ,  $\mathbf{Y} = \{R_{k+1}, \dots, R_{t-1}\}$  and  $\mathbf{Z} = \{R_{t+1}, \dots, R_n\}$ . Suppose  $R_k$  and  $R_t$  are applications of Rule (a) and no member of  $\mathbf{Y}$  is an application of Rule (a). Then the following is a valid thinning sequence  $\mathbf{R}' = \{\mathbf{X}, R_k, R_t, \mathbf{Y}, \mathbf{Z}\}$ .

*Proof.* When applying the thinning sequence  $\mathbf{R}$ , we start with  $\mathbf{S}_{ij}^* = \mathbf{S}_{ij}$  and reduce a set  $\mathbf{S}_{ij}^*$  after each rule application. The key observation here is that if an application of Rule (a) is valid at some state of the thinned separators, it will be valid at any earlier state of these separators (because no thinned separator can be smaller at an earlier state). Moreover, if an application of Rules (b,c) is valid at some state of the thinned separators, it will be valid at any later state of these separators.  $\square$

*Proof of Theorem 12.* Consider a thinning sequence  $\mathbf{R}$ . We can apply Lemma 4 repeatedly to obtain a valid thinning sequence  $\mathbf{R}'$  that has the same rule applications as  $\mathbf{R}$  and in which Rules (a) appear before Rules (b,c). The sequences  $\mathbf{R}$  and  $\mathbf{R}'$  generate the same jointree thinning since they contain the exact same rule applications.  $\square$

## PROOF OF THEOREM 7

Our proof starts with the correctness of the message passing algorithm using classical separators and then shows that the algorithm continues to be sound after we apply a thinning rule to remove a variable from some separator (recall that every jointree thinning can be obtained by a sequence of thinning rules). We will use  $\mathbf{S}'$  to indicate the state of separators after some rule applications.

Our proof uses the following variant on Definition 7. We will say that a jointree node  $i$  is *strongly*  $(X, \mathbf{S}')$ -connected to a factor  $f$  iff  $i$  hosts  $f$  or  $\text{vars}(f)$  appears in every separator  $\mathbf{S}'_{kl}$  on the path between node  $i$  and some leaf node  $j$  that hosts  $f$ . Similarly, we will say that jointree nodes  $i$  and  $j$  are *strongly*  $(X, \mathbf{S}')$ -connected iff  $i = j$  or variables  $\text{vars}(f_X)$  appear in every separator  $\mathbf{S}'_{kl}$  on the path between  $i$  and  $j$ .

The thinning rules for distinct variables do not interact with one another. Hence, we will assume in this proof that all thinning rules are applied according to a reverse topological ordering  $\pi$  of the variables in the underlying DAG.

We will use two lemmas in this proof. The first says that  $X$ -connection (Definition 7) and strong  $X$ -connection (defined above) are equivalent when applying thinning rules according to reverse topological ordering  $\pi$ .

**Lemma 5.** Suppose  $\mathbf{S}'$  is the state of separators after applying thinning rules to variables that do not follow variable  $X$  in order  $\pi$ . For jointree edge  $(i, j)$ , node  $i$  is  $(X, \mathbf{S}')$ -connected to some  $f_X$  on the  $i$ -side of the edge and node  $j$  is  $(X, \mathbf{S}')$ -connected to some  $f_X$  on the  $j$ -side of the edge iff  $i$  is *strongly*  $(X, \mathbf{S}')$ -connected to some  $f_X$  on the  $i$ -side and  $j$  is *strongly*  $(X, \mathbf{S}')$ -connected to some  $f_X$  on the  $j$ -side.

*Proof.* The if part follows from the fact that  $X \in \text{vars}(f_X)$ . We next show the only-if part. Suppose node  $i$  is  $(X, \mathbf{S}')$ -connected to node  $l$  that hosts  $f_X$  on the  $i$ -side and node  $j$  is  $(X, \mathbf{S}')$ -connected to node  $r$  that hosts  $f_X$  on the  $j$ -side. By the property of classical separators,  $\text{vars}(f_X) \subseteq \mathbf{S}_{xy}$  for all edges  $(x, y)$  on the path between  $l$  and  $r$ . Since  $\pi$  is a reverse topological ordering of the variables, none of the parents of  $X$  ( $\text{vars}(f_X) \setminus \{X\}$ ) are thinned from the separators. Therefore,  $\text{vars}(f_X) \setminus \{X\} \subseteq \mathbf{S}'_{xy}$  for all edges  $(x, y)$  on the path between  $l$  and  $r$ . Since node  $i$  is  $(X, \mathbf{S}')$ -connected to  $l$  and node  $j$  is  $(X, \mathbf{S}')$ -connected to  $r$ , we conclude that node  $i$  is *strongly*  $(X, \mathbf{S}')$ -connected to  $l$  and node  $j$  is *strongly*  $(X, \mathbf{S}')$ -connected to  $r$ .  $\square$

The second lemma extends Theorem 3 to a more general setting. For factors  $f$  and  $\mathcal{F}$ , we will write  $f \in \mathcal{F}$  to mean that  $\mathcal{F} = f \cdot g$  for some factor  $g$ .

**Lemma 6.** Consider factor  $\mathcal{G} = \sum_{\mathbf{S}_1} \gamma_1 \cdots \sum_{\mathbf{S}_k} \gamma_k \cdot \mathcal{H}$  where  $\gamma_1, \dots, \gamma_k$  are arbitrary factors,  $f_X \in \mathcal{H}$  and

$\text{vars}(f_X) \subseteq \mathbf{S}_1, \dots, \text{vars}(f_X) \subseteq \mathbf{S}_k$  for some mechanism  $f_X$  of variable  $X$ . If  $f_X \in \mathcal{F}$ , then  $\mathcal{F} \cdot \mathcal{G} = \mathcal{F} \cdot \mathcal{G}'$  where  $\mathcal{G}' = \sum_{\mathbf{S}_1} \gamma_1 \cdots \sum_{\mathbf{S}_k} \gamma_k \cdot \sum_X \mathcal{H}$ .

*Proof.* Suppose  $f_X \in \mathcal{F}$ . Then  $\mathcal{F} = f_X \cdot \mathcal{F}'$  for some factor  $\mathcal{F}'$ . Moreover,  $\mathcal{F} \cdot \mathcal{G}$  equals to

$$\begin{aligned} & \mathcal{F}' \cdot f_X \cdot \sum_{\mathbf{S}_1} \gamma_1 \cdots \sum_{\mathbf{S}_k} \gamma_k \cdot \mathcal{H} \\ &= \mathcal{F}' \cdot \sum_{\mathbf{S}_1} \gamma_1 \cdots \sum_{\mathbf{S}_k} \gamma_k \cdot f_X \cdot \mathcal{H} \\ &= \mathcal{F}' \cdot \sum_{\mathbf{S}_1} \gamma_1 \cdots \sum_{\mathbf{S}_k} \gamma_k \cdot f_X \cdot \sum_X \mathcal{H} \quad (\text{by Theorem 3}) \\ &= \mathcal{F}' \cdot f_X \cdot \sum_{\mathbf{S}_1} \gamma_1 \cdots \sum_{\mathbf{S}_k} \gamma_k \cdot \sum_X \mathcal{H} \\ &= \mathcal{F} \cdot \mathcal{G}'. \quad \square \end{aligned}$$

We are now ready for the soundness proof. For jointree edge  $(i, j)$ , let  $\mathcal{M}'_{ij}$  and  $\mathcal{M}'_{ji}$  denote the messages between  $i$  and  $j$  under separators  $\mathbf{S}'$ . We will next show  $Pr(\mathbf{S}'_{ij}) = \mathcal{M}'_{ij} \mathcal{M}'_{ji}$  for all edges  $(i, j)$  by induction on rule applications. For each rule application, we will use  $\mathbf{S}$  to denote the separators before thinning by the rule and  $\mathbf{S}'$  to denote the separators after thinning by the rule. Initially,  $Pr(\mathbf{S}_{ij}) = \mathcal{M}_{ij} \mathcal{M}_{ji}$  for all edges  $(i, j)$  by Theorem 5. We next show that this equality holds after each rule application. We consider three cases, one for each rule type.

(1) Rule (a) is applied to edge  $(i, j)$ :  $X \in \mathbf{S}_{ij}$  and  $X \notin \mathbf{S}'_{ij}$ . By definition of Rule (a) and Lemma 5, node  $i$  is strongly  $(X, \mathbf{S})$ -connected to some mechanism  $f_X$  hosted at leaf node  $l$  on the  $i$ -side and node  $j$  is strongly  $(X, \mathbf{S})$ -connected to some mechanism  $f_X$  hosted at leaf node  $r$  on the  $j$ -side.

First, we have  $\mathcal{M}'_{ij} \cdot \mathcal{M}'_{ji} = \mathcal{M}_{ij} \cdot \mathcal{M}_{ji}$  by Corollary 1. Consider now any edge  $(k, z)$  on the path  $l \dots k \dots z \dots r$  between leaf nodes  $l$  and  $r$  and suppose WLG that edge  $(i, j)$  is on the subpath  $z \dots r$ . Using Lemma 6 with  $\mathcal{F} = \mathcal{M}_{kz}$ ,  $\mathcal{G} = \mathcal{M}_{zk}$  and  $\mathcal{H} = \mathcal{M}_{ji}$ , we get  $\mathcal{M}_{kz} \cdot \mathcal{M}_{zk} = \mathcal{M}'_{kz} \cdot \mathcal{M}'_{zk}$ . That is, removing  $X$  from the separator of edge  $(i, j)$  does not affect the product of messages for edge  $(k, z)$ . Finally, consider any edge  $(k, z)$  that is not on the path between leaf nodes  $l$  and  $r$ . Let  $t$  be the node on this path which is closest to edge  $(k, z)$ . Let  $l', r', u$  be the neighbors of  $t$  that are closest to  $l, r$  and edge  $(k, z)$ , respectively. To show  $\mathcal{M}_{kz} \cdot \mathcal{M}_{zk} = \mathcal{M}'_{kz} \cdot \mathcal{M}'_{zk}$ , it suffices to show  $\mathcal{M}'_{tu} = \mathcal{M}_{tu}$ . WLG, suppose node  $j$  is closer to  $t$  than node  $i$ . Since  $\mathcal{M}_{tu} = \sum_{\mathbf{S}_{tu}} \gamma \cdot \mathcal{M}_{l't} \cdot \mathcal{M}_{r't}$ , where  $\gamma$  denotes the product of other invariant messages, we can use Lemma 6 again with  $\mathcal{F} = \mathcal{M}_{l't}$ ,  $\mathcal{G} = \mathcal{M}_{r't}$  and  $\mathcal{H} = \mathcal{M}_{ij}$  to get  $\mathcal{M}'_{l't} \cdot \mathcal{M}'_{r't} = \mathcal{M}_{l't} \cdot \mathcal{M}_{r't}$ . Hence, applying Rule (a) preserves the product of messages for all jointree edges.

(2) Rule (b) is applied to edge  $(i, j)$ :  $X \in \mathbf{S}_{ij}$  and  $X \notin \mathbf{S}'_{ij}$ . By definition of Rule (b), node  $i$  is not a leaf and

$X \notin \mathbf{S}_{ki}$  for  $k \neq j$ . Then  $\mathcal{M}'_{ij} = \sum_X \mathcal{M}_{ij} = \mathcal{M}_{ij}$  since messages  $\mathcal{M}_{ki}$  do not contain  $X$ . Moreover,  $Pr(\mathbf{S}'_{ij}) = \sum_X Pr(\mathbf{S}_{ij}) = \sum_X \mathcal{M}_{ij} \cdot \mathcal{M}_{ji} = \mathcal{M}_{ij} \cdot (\sum_X \mathcal{M}_{ji}) = \mathcal{M}'_{ij} \cdot \mathcal{M}'_{ji}$ . We next consider edges other than  $(i, j)$ .

Since  $\mathcal{M}'_{ij} = \mathcal{M}_{ij}$ , all messages outgoing from node  $j$  are invariant. Hence, the product of messages is invariant for any edge on the  $j$ -side of edge  $(i, j)$ . We next show that all message outgoing from  $i$  to neighbors  $k \neq j$  are also invariant. This shows that the product of messages is also invariant for all edges on the  $k$ -side of any edge  $(k, i)$ .

$$\begin{aligned} \mathcal{M}_{ik} &= \sum_{\mathbf{S}_{ik}} \mathcal{M}_{ji} \cdot \prod_{t \neq k, t \neq j} \mathcal{M}_{ti} \\ &= \sum_{\mathbf{S}_{ik}} (\sum_X \mathcal{M}_{ji}) \cdot \prod_{t \neq k, t \neq j} \mathcal{M}_{ti} \\ &= \sum_{\mathbf{S}_{ik}} \mathcal{M}'_{ji} \cdot \prod_{t \neq k, t \neq j} \mathcal{M}'_{ti} \\ &= \mathcal{M}'_{ik}. \end{aligned}$$

The second step follows since  $X \notin \mathbf{S}_{ki}$  and also  $X \notin \mathbf{S}_{ti}$ . The third step follows since messages  $\mathcal{M}_{ti}$  are invariant to thinning variable  $X$  from separator  $\mathbf{S}_{ij}$ .

(3) Rule (c) is applied to edge  $(i, j)$ . Similar to case (2).

## PROOF OF THEOREM 13

*Proof.* Suppose replication  $\mathcal{F}_1$  has width  $w$ . Then it must have a causal jointree  $\mathcal{T}_1$  of width  $w$ . We can turn  $\mathcal{T}_1$  into a causal jointree  $\mathcal{T}_2$  for replication  $\mathcal{F}_2$  by assigning more factors to leaf nodes in  $\mathcal{T}_1$ . In particular, for each replica  $f_X \in \mathcal{F}_2 \setminus \mathcal{F}_1$ , assign this replica to a leaf node in  $\mathcal{T}_1$  which hosts a mechanism  $f_X$ . This guarantees that  $\mathcal{T}_2$  will also have width  $w$ . Since replication  $\mathcal{F}_2$  has a causal jointree of width  $w$ , its width must be  $\leq w$ .  $\square$

## PROOF OF THEOREM 14

*Proof.* The fact that Algorithm 1 computes a complete replication follows directly from the statement of the algorithm. Suppose there exists another complete replication  $\mathcal{F}'$  that is different from the complete replication  $\mathcal{F}$  computed by Algorithm 1. Then  $\mathcal{F}'$  and  $\mathcal{F}$  must differ on the number of mechanisms  $f_X$  for some functional variable  $X$ . Suppose  $X$  is the first variable visited by Algorithm 1 on which this disagreement takes place. Then  $\mathcal{F}$  and  $\mathcal{F}'$  must have the same number of  $X$ -feedings factors; otherwise, they will have a different number of mechanisms for some descendant of variable  $X$ . Since  $\mathcal{F}$  and  $\mathcal{F}'$  both satisfy Definition 13 and they have the same number of  $X$ -feeding factors, they must have the same number of mechanisms  $f_X$ . This contradicts the assumption that  $\mathcal{F}'$  and  $\mathcal{F}$  differ on the number of mechanisms for variable  $X$ . Hence,  $\mathcal{F} = \mathcal{F}'$ .  $\square$



## PROOF OF THEOREM 15

**Lemma 7.** Consider a replication  $\mathcal{F}$  that contains  $n > 1$  mechanisms for variable  $X$  and  $m$   $X$ -feeding factors where  $n > m$ . Let  $\mathcal{F}'$  be the result of removing one mechanism for  $X$  from  $\mathcal{F}$  (hence,  $|\mathcal{F}'| = |\mathcal{F}| - 1$ ). The width of  $\mathcal{F}'$  is no greater than the width of  $\mathcal{F}$ .

*Proof.* Let  $\mathcal{T}$  be a causal jointree for  $\mathcal{F}$ . We can turn  $\mathcal{T}$  into a causal jointree  $\mathcal{T}'$  for  $\mathcal{F}'$  with no greater width as follows. Suppose there exists a leaf node in  $\mathcal{T}$  that hosts two mechanisms  $f_X$ . We can then remove one of these mechanisms from the leaf without increasing the width. Suppose now that each leaf node in  $\mathcal{T}$  hosts at most one mechanism  $f_X$ . The edges of  $\mathcal{T}$  which contain variable  $X$  in their (thinned) separators form a set of connected subtrees. Each one of these subtrees will contain at most one mechanism  $f_X$  (otherwise thinning Rule (a) will apply). By the pigeonhole principle, at least one of these subtrees must contain a mechanism  $f_X$  but no  $X$ -feeding factors. We can show that removing this mechanism  $f_X$  from the subtree would not increase the causal width of resulting tree. Hence, if  $\mathcal{F}$  has a causal jointree of width  $w$ , then  $\mathcal{F}'$  has a causal jointree of no greater width. This implies that the width of  $\mathcal{F}'$  is no greater than the width of  $\mathcal{F}$ .  $\square$

*Proof of Theorem 15.* We first construct a new replication  $\mathcal{G} = \mathcal{F} \cup \mathcal{F}'$ . By Theorem 13, the width of  $\mathcal{G}$  is no greater than the width of  $\mathcal{F}'$ . We then go through the functional variables in reverse-topological order (as visited by Algorithm 1). For each variable  $X$ , we compare if the  $X$ -mechanisms in  $\mathcal{F}$  and  $\mathcal{G}$  are equal. If so, we proceed to the next functional variable in the order. Otherwise,  $\mathcal{G}$  contains more mechanisms than  $\mathcal{F}$  and thus there are more  $X$ -mechanisms than  $X$ -feeding factors in  $\mathcal{G}$ . By Lemma 7, we are licensed to remove the excess  $X$ -mechanisms from  $\mathcal{G}$  without increasing its width. By the end of this process,  $\mathcal{G}$  will become equal to complete replication  $\mathcal{F}$ . Hence, the width of  $\mathcal{F}$  is no greater than the width of  $\mathcal{F}'$ .  $\square$

## PROOF OF THEOREM 16

*Proof.* In a complete replication, the number of mechanisms for a functional variable is upper-bounded by the total number of mechanisms of its children. Let  $X$  be a functional variable and  $f(X)$  be the number of mechanisms in the complete replication, then  $f(X) = \sum_{C_i} f(C_i) \leq c \cdot \max_{C_i} f(C_i)$  where  $C_i$  are the children of  $X$  in the DAG. Hence, we can recursively bound the number of mechanisms for all the functional nodes in a functional chain. Since the longest functional chain has a length of  $k$ , we can recursively apply the above bound for at most  $k$  steps. When the recursion terminates,  $\max_{C_i} f(C_i) = 1$  since all  $f(C_i)$  will be non-functional variables. Therefore,  $f(X) \leq c^k$  for each functional variable  $X$  in the replication. The inequality also

| % func | replication type |       |        |        |        |        |        |          |
|--------|------------------|-------|--------|--------|--------|--------|--------|----------|
|        | $c$              | $5c$  | $10c$  | $15c$  | $20c$  | $25c$  | $30c$  | complete |
| 25%    | 126.2            | 334.1 | 594.6  | 854.3  | 1114.1 | 1373.6 | 1634.2 | 181.1    |
| 50%    | 151.2            | 561.4 | 1076.0 | 1588.9 | 2104.1 | 2618.3 | 3132.3 | 513.4    |
| 75%    | 178.7            | 799.3 | 1575.6 | 2352.9 | 3128.2 | 3907.0 | 4682.3 | 2564.3   |
| 100%   | 187.0            | 867.7 | 1721.0 | 2573.5 | 3429.6 | 4280.1 | 5132.8 | 4448.0   |

Table 1: Average size of replications. Replication  $nc$  means: the number of replicas for a node  $X$  is between  $(n-1)c$  and  $nc$  where  $c$  is the number of children for node  $X$ .

holds for non-functional variables,  $f(X) = 1 = c^0 \leq c^k$ . Given a total of  $n$  nodes in the DAG, we have at most  $O(nc^k)$  factors in the complete replication.  $\square$

## FURTHER EXPERIMENTS

We report here an additional experiment that reveals the importance of replication strategies and how such strategies interact with jointree construction methods.

We first note that classical methods for constructing jointrees do not directly apply to the construction of jointrees for replications. To see why, consider a set of factors  $\mathcal{F}$  with no replicas. The classical method for constructing a jointree for such factors is to first construct a *primal graph*. This is a graph with nodes corresponding to the variables in factors  $\mathcal{F}$  and which includes an edge between two variables iff they appear in the same factor.<sup>7</sup> Consider now a replication  $\mathcal{F}'$  of factors  $\mathcal{F}$ . It follows immediately that the primal graph of  $\mathcal{F}'$  is precisely the primal graph of  $\mathcal{F}$ . Hence, a classical jointree construction method will produce the same jointree for factors  $\mathcal{F}$  and for all their replications. [Darwiche, 2020] proposed a jointree construction method that targets complete replications. For a non-leaf functional variable  $X$ , the method uses a distinct name for  $X$  in each of its  $n$  replicas and these distinct names are also used in the  $X$ -feeding factors whose count is also  $n$ . A jointree is then constructed using a classical technique followed by a reversal of the renaming process. While this method proved generally effective, it applies only to complete replications.

The experiment we conducted compared the complete replication strategy with random replications of increasing size, while varying the percentage of functional, non-root nodes in a Bayesian network (25, 50, 75, 100). The comparison was based on constructing jointrees using the minfill heuristic (see Footnote 7). We used the method of [Darwiche, 2020] for complete replications, and adapted it somewhat arbitrarily for random replications. In particular, when the number of  $X$ -feeding factors did not match the number of  $X$ -mechanisms, we renamed variables in the  $X$ -feeding fac-

<sup>7</sup>There are various methods for constructing a jointree based on a primal graph; see [Darwiche, 2009, Ch 9]. One of the popular methods is to construct a low-width elimination order for the primal graph using the *minfill* heuristic and to then convert the order into a jointree of no greater width. This is what we used.

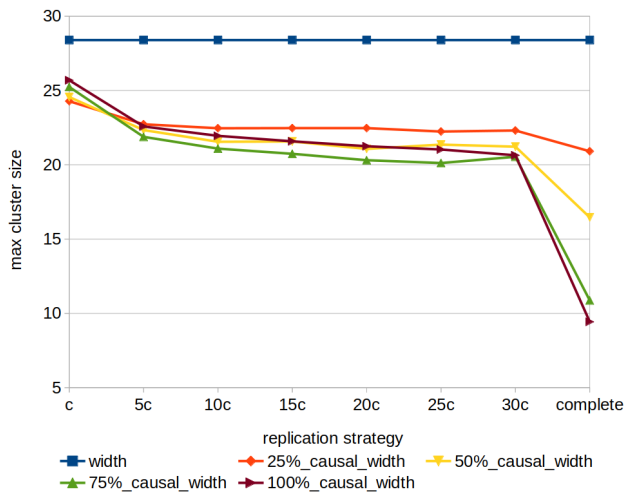

Figure 8: Illustrating the impact of replication strategies.

tors distinctly to the extent possible and randomly thereafter.

Table 1 shows the size of random and complete replications, with some random replications being larger than complete replications. Figure 8 shows the mean maximal cluster size ( $\text{width}+1$ ) for jointrees and causal jointrees where each data point is an average over 100 random Bayesian networks, each containing 100 nodes. A few patterns are clear. First, the causal width is always smaller than the width, and quite substantially smaller, even when using random replications. Second, complete replications always produced a smaller causal width compared to random replications, particularly when the number of functional nodes is largest (100%). Third, increasing the size of a random replication almost always correlated with decreasing the causal width but up to a certain point after which increasing the size of a replication did not help. The few exceptions to this pattern highlight the suboptimality of the jointree construction method we used (see Theorem 13) and the suboptimality of the heuristic for applying thinning rules. Beyond emphasizing some of the theoretical results we presented earlier, this experiment further highlights the practical significance of causal treewidth and causal jointrees as they can lead to an exponential reduction in inference complexity. The experiment also highlights the need for developing principled jointree construction methods that target replications which are not complete, and highlight the need for further heuristics to guide the application of thinning rules.
